# Supplementary material for: Exploring potential biomarkers and therapeutic targets in inflammatory bowel disease: insights from a mega-analysis approach
Source: PubMed Central journal article supplement (PMC10951083; doi:10.3389/fimmu.2024.1353402), 2024-03-06
Supplement: Presentation_1.pdf [file Presentation_1.pdf]

## Supplementary Methods and Material

### Exploring potential biomarkers and therapeutic targets in Inflammatory Bowel Disease: insights from a Mega-Analysis approach

#### Supplementary Methods

For the detection of DEGs by comparing each disease (CD/UC/IBD) to control samples we used means model as described in the following linear equation:

$$\text{expression} = \beta_1 \text{ Disease} + \beta_2 \text{ Control} + \gamma_1 \text{ Study}_1 + \dots + \gamma_{n-1} \text{ Study}_{n-1}$$

The corresponding design matrix was defined as

`design <- model.matrix(~0+group+studyBatch)`, where group contained disease (CD/UC/IBD) and control samples.

Note, that in these models, disease and control samples were taken from same tissue.

For the detection of DEGs to include in machine learning models discriminating between UC and CD samples, we had two factor model, disease-type (CD/UC/Control) and tissue (ileum/rectum). We merged the disease-type and tissue to a single group factor as follows:

CD\_ileum, UC\_rectum, Control\_ileum, Control\_rectum. Our design matrix was defined as mentioned above, and the comparison of interests were defined as:

1. Interaction term:  $[\text{CD\_ileum} - \text{Control\_ileum}] - [\text{UC\_rectum} - \text{Control\_rectum}]$
2. Tissue effect:  $[\text{Control\_ileum} - \text{Control\_rectum}]$

Only genes having significant interaction, and non-significant tissue effect were included in ML models.

#### Supplementary Material

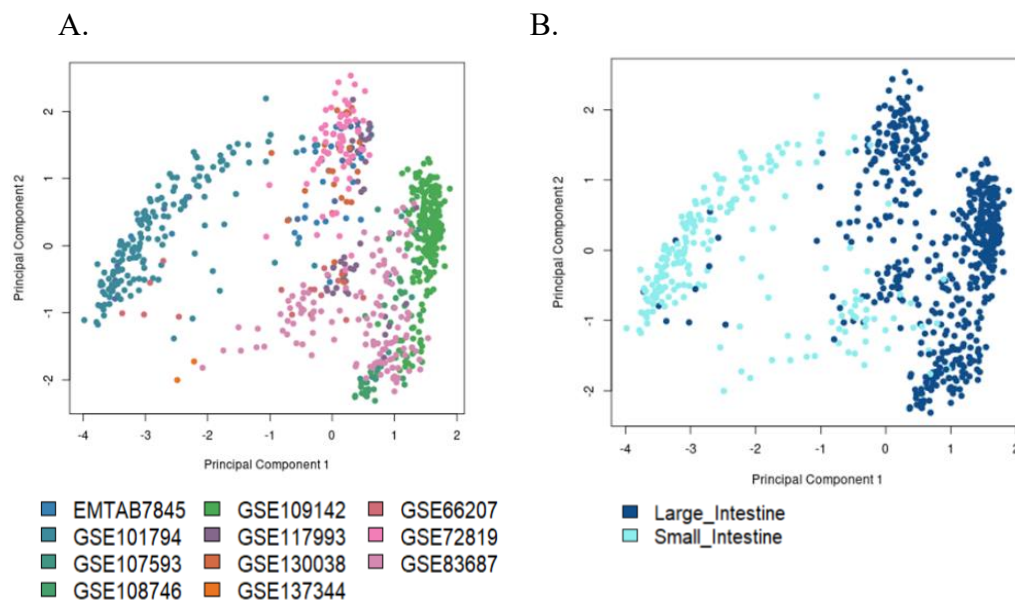

#### Supplementary Figure 1:

Multidimensional scaling (MDS) plot. (A) Separation of data based on specific study dataset. (B) Separation of data based on Tissue source.

A.

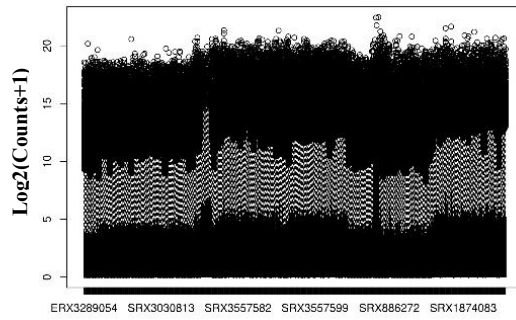

B.

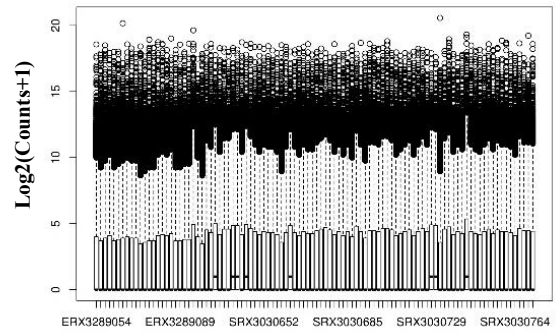

C.

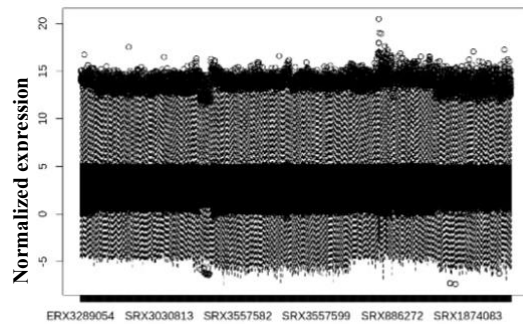

D.

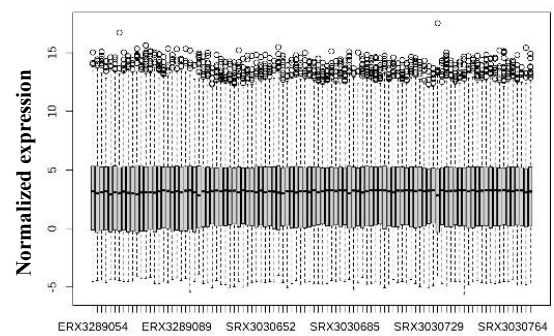

E.

|                          | Mean     | Median   | SD       | Variance | Q1 | Q3 | Min | Max     | IQR |
|--------------------------|----------|----------|----------|----------|----|----|-----|---------|-----|
| <b>Raw counts</b>        | 345.6878 | 0        | 5577.577 | 31109365 | 0  | 30 | 0   | 5775495 | 30  |
| <b>Normalized counts</b> | 2.075981 | 2.466036 | 3.556127 | 13       | -1 | 5  | -7  | 20      | 6   |

**Supplementary Figure 2:** Boxplots depict the distribution of read counts in each sample before (A-B) and after normalization (C-D). (A) Log<sub>2</sub>-transformed raw expression counts. (B) Distribution of log<sub>2</sub>-transformed raw expression counts across 100 random samples. (C) Normalized and voom-transformed counts. (D) Normalized and voom-transformed counts across 100 random samples. (E) Statistics of expression counts data pre- and post-normalization.

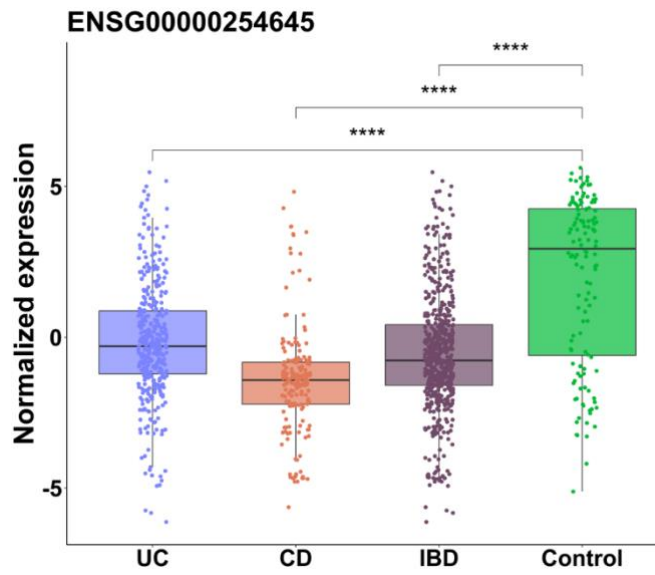

**Supplementary Figure 3:** Normalized expression of lncRNA ENSG00000254645 across all the different diagnosis. Statistical significance between each diagnosis and the Control group was assessed using Wilcoxon test. \*\*\*\* $p < 0.0001$  indicate the significance levels.

**Supplementary Table 1:** The tuned hyperparameters for each model.

|                      | UC vs. Control | CD vs. Control | IBD vs. Control |
|----------------------|----------------|----------------|-----------------|
| <b>SelectKBest</b>   |                |                |                 |
| K                    | 10             | 9              | 34              |
| randomstate          | 123            | 456            | 100             |
| <b>SVM</b>           |                |                |                 |
| C                    | 10             | 1000           | 100             |
| gamma                | 0.01           | 0.001          | 0.001           |
| kernel               | sigmoid        | sigmoid        | rbf             |
| <b>KNN</b>           |                |                |                 |
| n                    | 11             | 3              | 17              |
| p                    | 1              | 2              | 5               |
| <b>Random Forest</b> |                |                |                 |
| bootstrap            | TRUE           | TRUE           | TRUE            |
| max depth            | 5              | 5              | 10              |
| max features         | auto           | log2           | log2            |
| n estimators         | 5              | 6              | 13              |
| random state         | 6              | 80             | 6061            |
| <b>Extra Tree</b>    |                |                |                 |
| bootstrap            | TRUE           | TRUE           | TRUE            |
| max depth            | 5              | 5              | 10              |
| max features         | auto           | auto           | auto            |
| n estimators         | 10             | 12             | 60              |
| random state         | 6              | 90             | 70              |
| <b>XGBoost</b>       |                |                |                 |
| learning rate        | 0.1            | 0.1            | 0.8             |
| min child weight     | 1              | 3              | 3               |
| gamma                | 0              | 0.7            | 0.8             |
| n estimators         | 100            | 100            | 300             |
| <b>Naïve Bayes</b>   |                |                |                 |
| var smoothing        | 1              | 1              | 1               |

**Supplementary Table 2:** Ten genes were selected using selectKbest feature selection method to discriminate between UC and CD.

| No. | Ensembl            | Symbol   |
|-----|--------------------|----------|
| 1   | ENSG00000162878.13 | PKDCC    |
| 2   | ENSG00000157005.4  | SST      |
| 3   | ENSG00000173221.14 | GLRX     |
| 4   | ENSG00000197093.11 | GAL3ST4  |
| 5   | ENSG00000196511.14 | TPK1     |
| 6   | ENSG00000076351.13 | SLC46A1  |
| 7   | ENSG00000057149.16 | SERPINB3 |
| 8   | ENSG00000104870.13 | FCGRT    |
| 9   | ENSG00000088367.23 | EPB41L1  |
| 10  | ENSG00000158813.18 | EDA      |

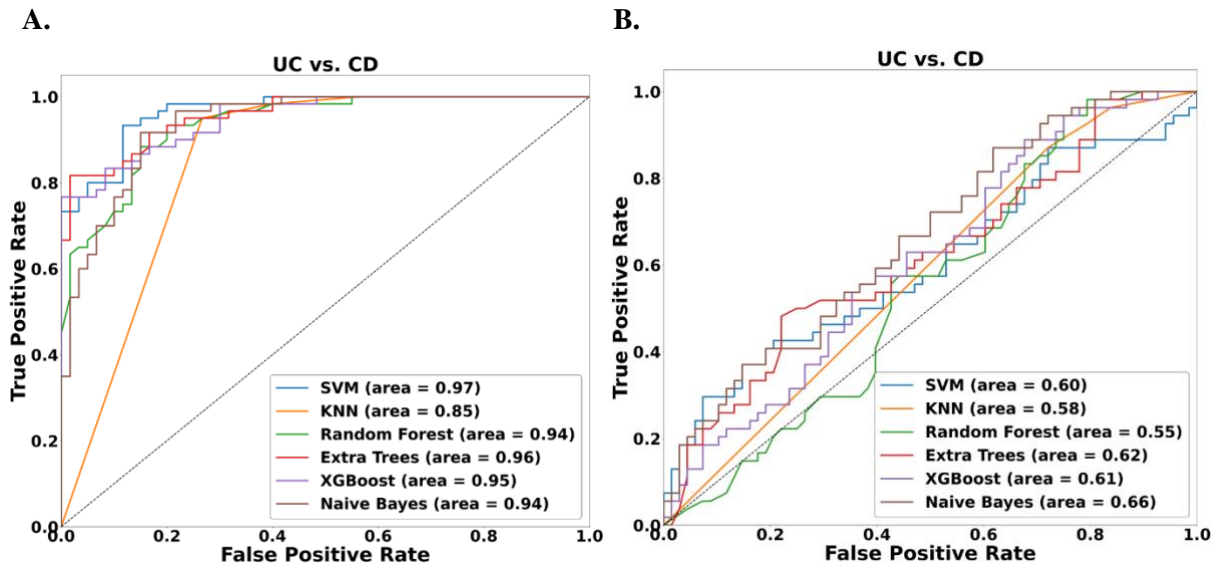

**Supplementary Figure 4:** ROC curves of True positive rate vs. False positive rate at different six models examined on validation data GSE193677 in UC vs. CD comparison. (A) ROC curve derived from validation set included 60 inflamed samples of UC from the rectum and 60 inflamed samples of CD from the ileum. (B) ROC curve derived from validation set, samples included in the analysis originated from the same inflamed tissue in both diseases, UC rectum (n = 54) and CD rectum (n = 68).

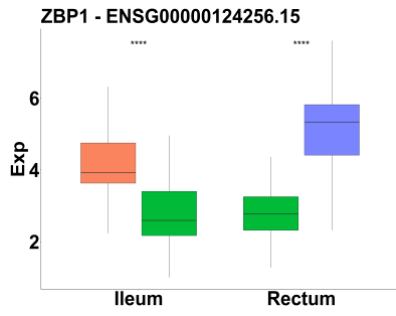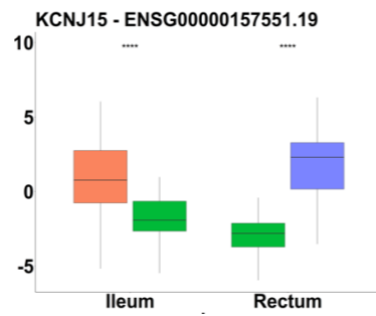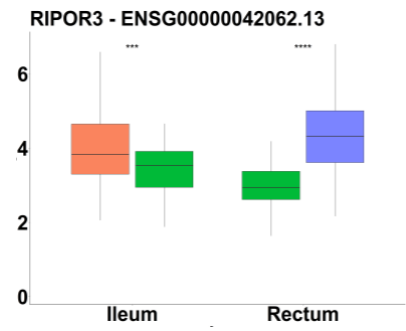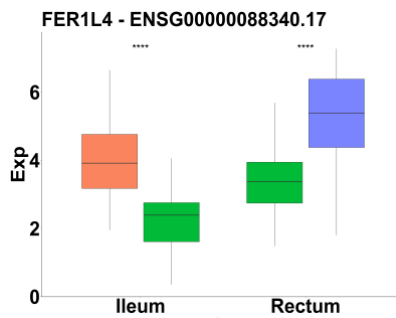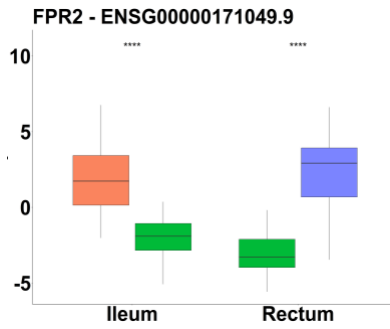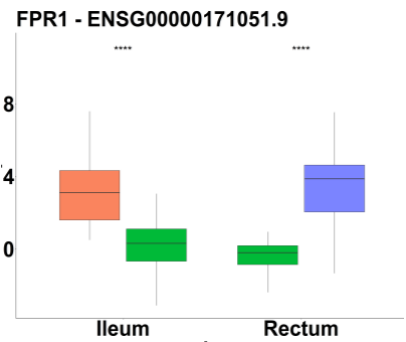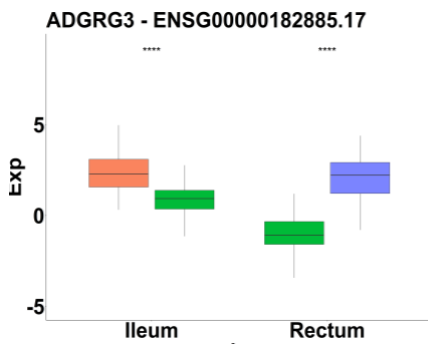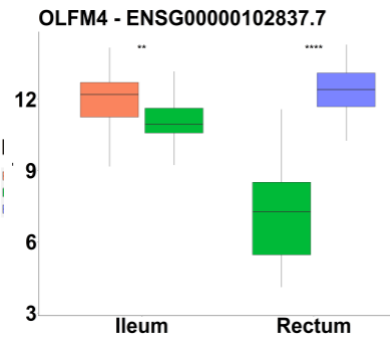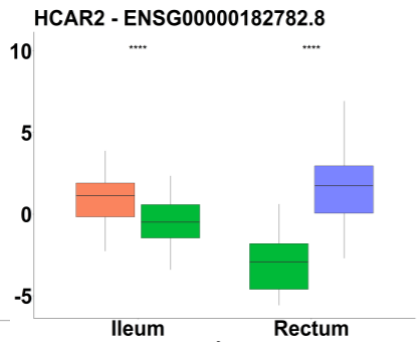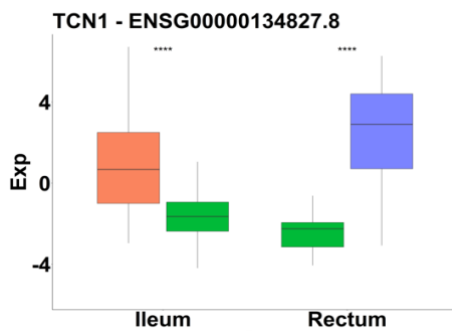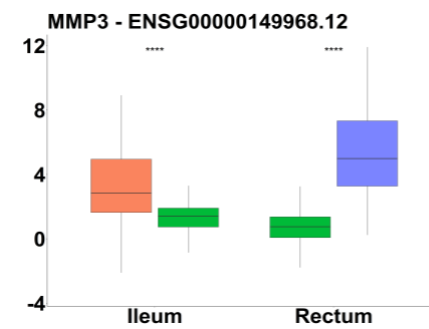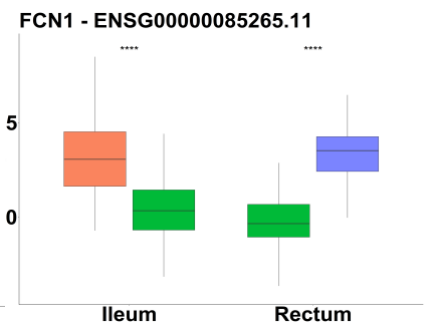

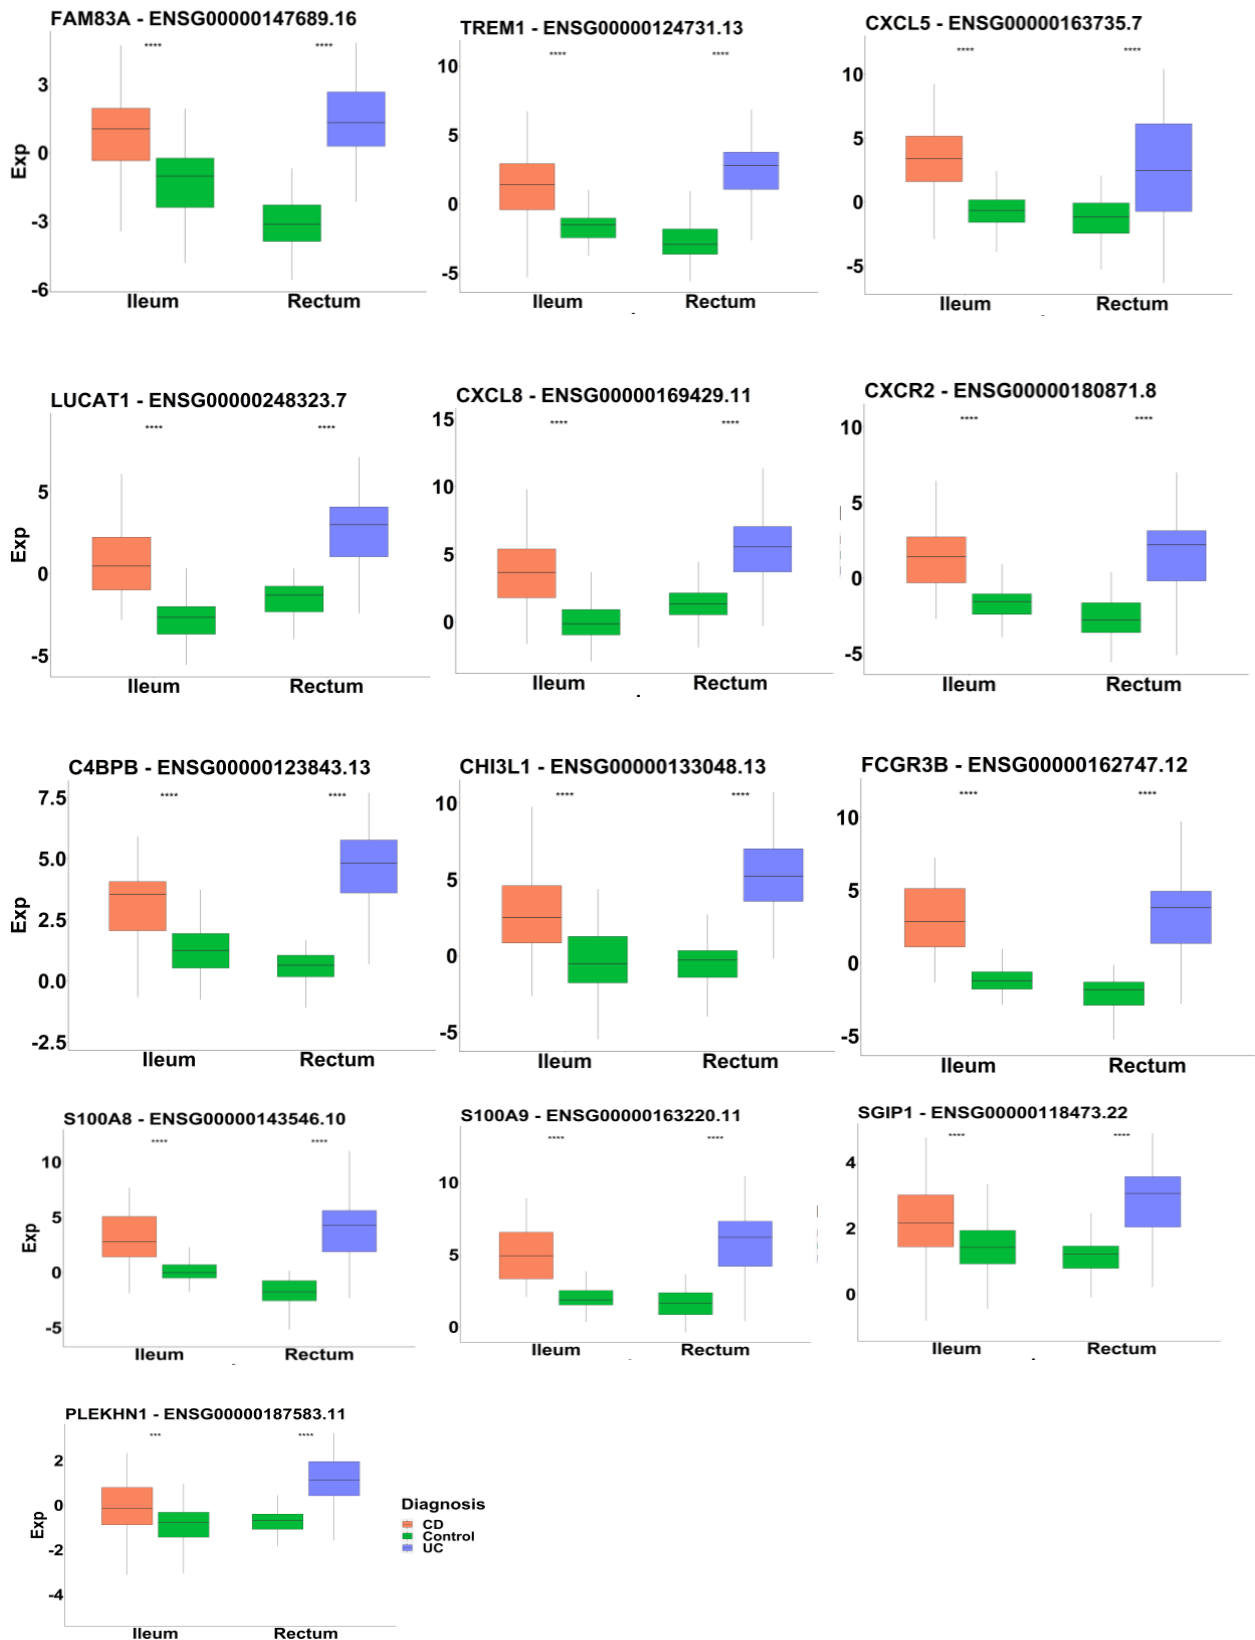

**Supplementary Figure 5:** Expression of selected genes across UC, CD and Control samples in GSE193677 validation dataset: The dataset includes inflamed samples from CD (n=60, ileum) and UC (n=60, rectum), along with control samples from both the ileum (n=60) and rectum (n=60). Statistical significance was assessed using Student's t-test. \*\*p < 0.01, \*\*\*p < 0.001, and \*\*\*\*p < 0.0001 indicate the significance levels.

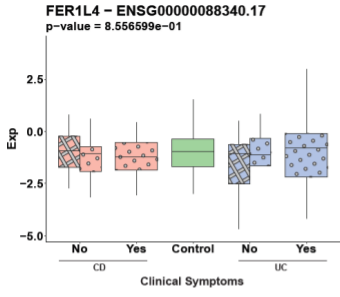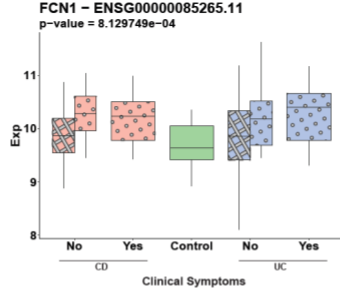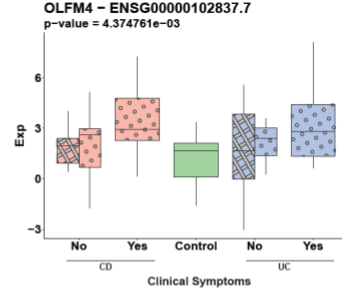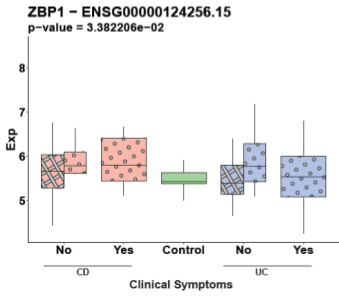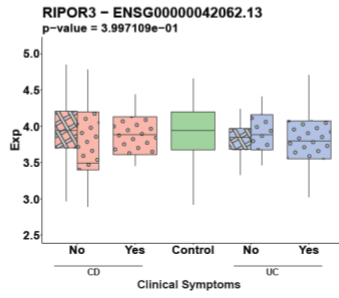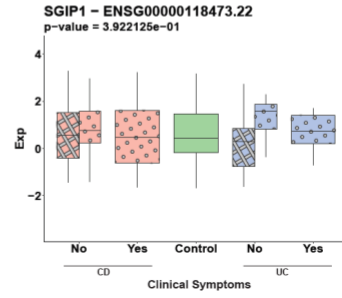

Endo State

- Control
- Inactive
- Severe

Diagnosis

- CD
- Control
- UC

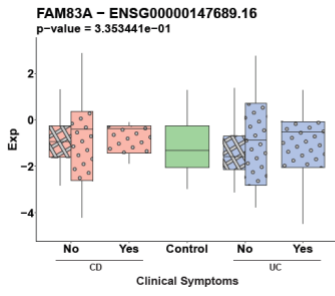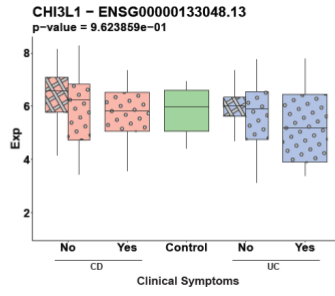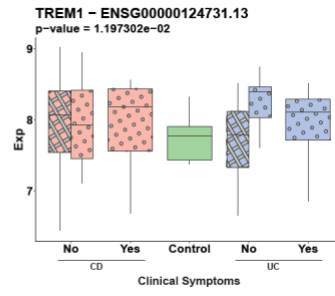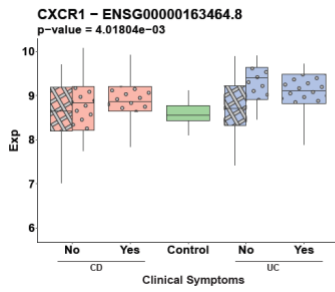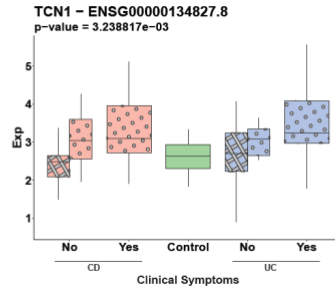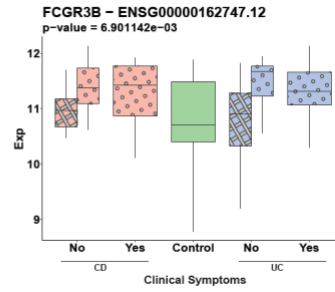



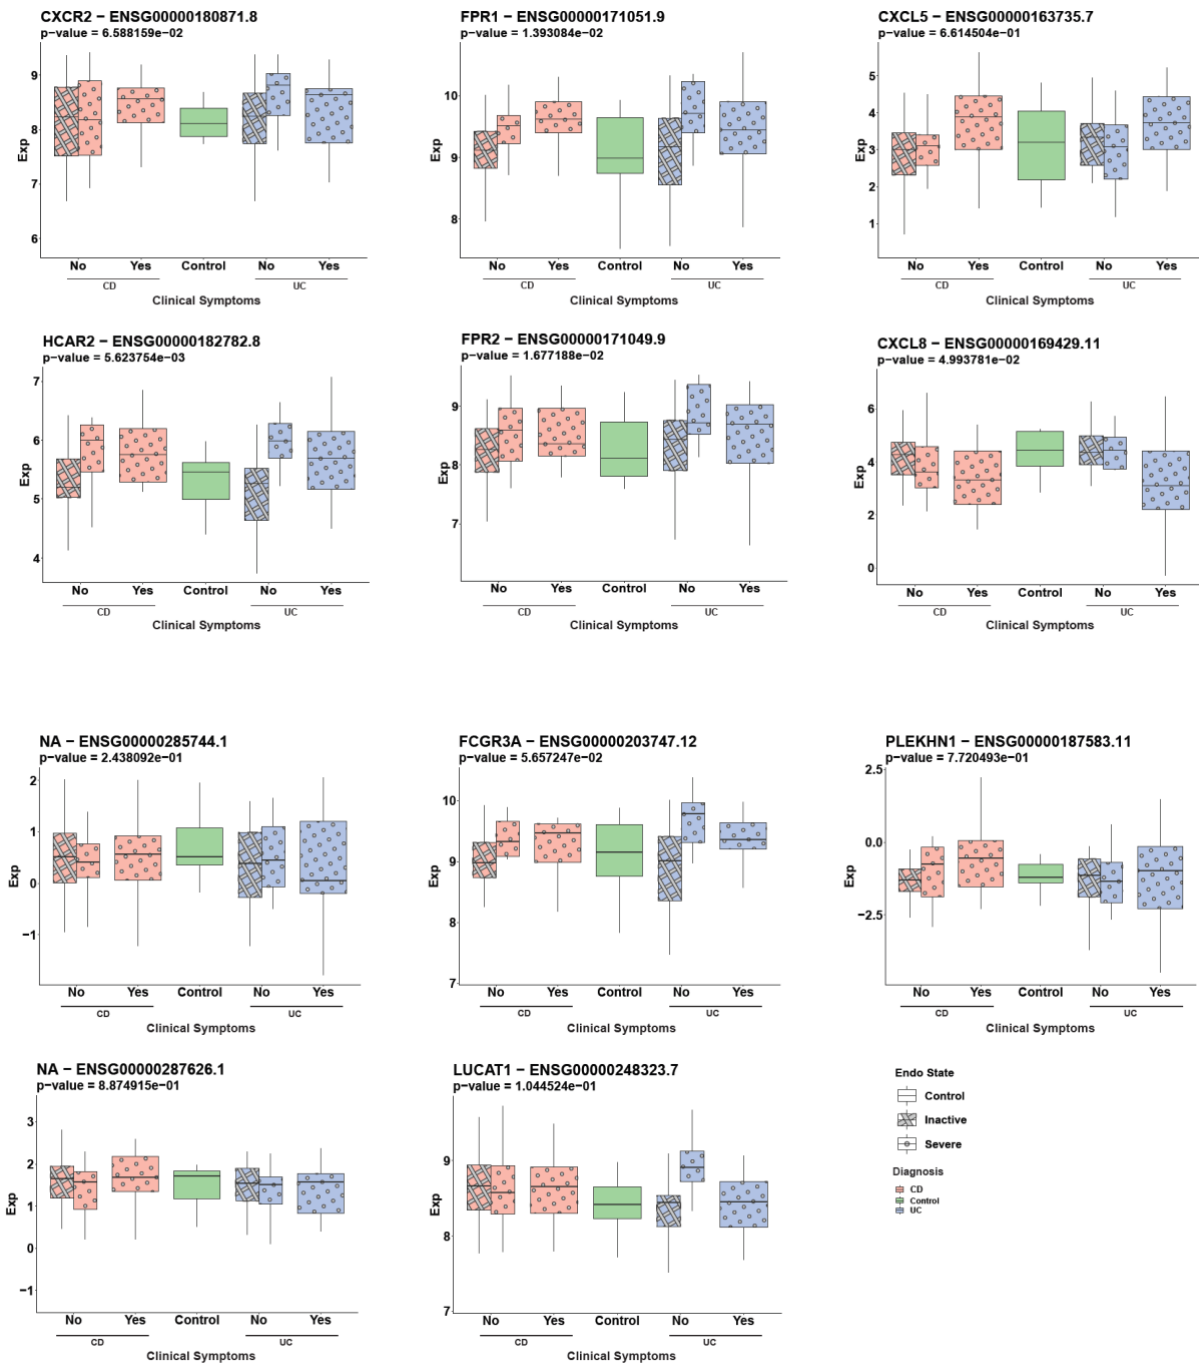

**Supplementary Figure 6:** Distribution of ML detected genes' normalized expression in serum samples across different patient groups. Pink and blue colors represent CD and UC patients, respectively. The pattern differentiation—crosshatch for an inactive endoscopic state and circles for a severe endoscopic state—reflects the severity of endoscopic conditions. The x-axis labels ('Yes' or 'No') distinguish between the presence or absence of clinical symptoms in patients, with 'Yes' indicating clinical symptoms and 'No' representing the absence of symptoms. The groups are: CD patients without clinical symptoms and either inactive (*pink, crosshatch*, n=20) or severe (*pink, circle*, n=15) endoscopic states, CD patients with clinical symptoms and severe endoscopic states (*pink, circle*, n=12), UC patients without clinical symptoms and either inactive (*blue, crosshatch*, n=20) or severe (*blue, circle*, n=13) endoscopic states, UC patients with clinical symptoms and severe endoscopic states (*blue, circle*, n=14) and the control group (*green*, n=17). The Wilcoxon test was used to assess statistical significance in the comparison between the severe endoscopic IBD groups and the control group.
